# Supplementary material for: Families’ Experiences of Surrogate Decision-Making and Challenges of Shared Decision- Making: A Cross-Sectional Study
Source: Research Square preprint supplement (doi:10.21203/rs.3.rs-4205018/v1), 2024-04-10
Supplement: Supplementary file 1 [file 63b721cba207b53c5b165198.xlsx]

## Sheet: Table 1
Table 1 Characteristics of study participants
Variables	Total (N=60)
	n	%
Region of Japan
Hokkaido	3	5
Tohoku	5	8.33333
Kanto	16	26.6667
Chubu	10	16.6667
Kinki	18	30
Shikoku	4	6.66667
Chugoku	1	1.66667
Kyusyu	2	3.33333
Age of categories
20-29	3	5
30-39	6	10
40-49	7	11.7
50-59	17	28.3
60-69	18	30
70-79	9	15
Age（mean±standard deviation)	55.3±13.0
Gender
Men	42	70
Women	18	30
Occupation
Full-time	36	60
Part-time	8	13.3
Unemployed	16	26.7
Highest level of education
High school	14	23.3
2-year college	5	8.3
Career college	7	11.7
College/university	31	51.7
Graduate	3	5
Family
Have family living together and have family separated	42	70
Have family members living together but do not have separated	9	15
No family living together but have separated family	7	11.7
No one	2	3.3
Preference regarding decision-making
Physicians decide for themselves based on their own knowledg	2	3.3
The physician decides, but takes my opinion into account	15	25
The physician and I decide together on an equal basis.	26	43.3
I decide, taking into account the physician's opinion	16	26.7
I decide on my own, based on my own knowledge	1	1.7

## Sheet: Table2
Table 2 Current situation when family members make surrogate decision-making
Variables	Total（N=60）		P-value
	n	%
Disease of patient
Cardiovascular	7	11.6667
Neurology and Neurosurgery	15	25
Gastroenterology	10	16.6667
Kidney and urinaly	6	10
Respiratory	8	13.3333
Hematology	2	3.33333
Infection	2	3.33333
Trauma	10	28.3
Psychiatric dementia	9	15
Malignant disoder	17	28.3
Contents of surrogate decision-making
Life-sustaining treatment	27	45
Emergency surgery	10	16.6667
Attached ventilator	5	8.33333
Brain death determination and organ transplantation	2	3.33333
Withholding or withdrawing
Nutrition such as gastrostomy	7	11.6667
Artificial dialysis	1	1.66667
Life supporting device	2	3.33333
Others	6	10
The decision was made according to the family's wishes.	6.4±2.7		0.044
The decision was made according to the patient's wishes.	7.3±2.2
The degree of mental burden when making surrogate decisions	7.0±2.6
What was referred to when making surrogate decisions
Discuss among family members	49	81.6667
Take counsel with a friend or someone trusted	10	16.6667
Refer to information in books, press, etc.	3	5
Refer to information on the Internet	13	21.6667
Refer to information on television	0	0
Referring to information from newspapers	1	1.66667
Referring to information discussed with the patient	18	30
Information from healthcare professionals	5	8.33333
Information from family who have had the same experience	1	1.66667
I don't have anything	3	5
Which healthcare professional have you consulted?
Primary physician	41	68.3333
Physician other than the primary physician	7	11.6667
Nurse (in-hospital nurse)	8	13.3333
Nurse (home care nurse)	3	5
Social worker	6	10
Pharmacist	2	3.33333
Physical therapist	1	1.66667
Care manager	1	1.66667
I have not consulted any	10	16.6667

## Sheet: table3
Table 3 Perceptions and item correlations for surrogate decision-making
	*1	*2	*3	*4	*5
*1 The decision was made according to the family's wishes.
*2 The decision was made according to the patient's wishes.	0.338**
*3 The degree of mental burden when making surrogate decisions	-0.2	0.074
*4 paticipant's age	0.132	0.057	0.1
*5 It's hard to discuss ACP with patients.	0.12	-0.019	0.121	0.109
*6 I want to have the opportunity to discuss ACP with patients.	0.139	0.112	0.026	0.41	-0.089
**P<.001
N=60, Spearman's rank correlation confficient

## Sheet: Sheet4
Table 4 Perceptions of Surrogate Decision-Makers of the Patient's Emergency Care
Variables	Total（N=60）
	n	%
Treatment that could not be well- understood
Arrival resuscitation	9	15
Mechanical ventilation	9	15
Assisted circulation device	26	43.3
Dialysis	9	15
Drug to maintain blood pressure	10	16.7
Nutrition (Tubal feeding etc)	11	18.3
Blood transfusion and Infusions	7	11.7
Infusions	22	36.7
Nothing	19	31.7
Respiratory treatment that could not well- understood
Intubate trachea	12	20
Have a tracheotomy	14	23.3
Non-invasive positive airway pressure ventilation	53	88.3
Procedures recognized as part of "cardiopulmonary resuscitation "
Artificial breath	45	75
Intubate trachea	40	66.6667
Mechanical ventilation	45	75
Chest compression	50	83.3333
Automated external defibrillator	47	78.3333
Drug to maintain blood pressure	25	41.6667
Nutrition (Tubal feeding etc)	7	11.6667
Blood transfusion	9	15
Infusions	7	11.6667
Nothing	3	5
I want to discuss advance care planning with my family.	7.3±2.4
Who do you consult when making surrogate decisions?
Marital partner/partner	37	61.6667
Children	21	35
Brother/sister	25	41.6667
Own parents	15	25
Partner's parents	6	10
Relatives	7	11.6667
Friends	10	16.6667
Others	2	3.33333
No one	1	1.66667
How difficult is it for you to discuss ACP with patients?	4.8±3.0
Information and values that are essential when making surrogate decisions
My age	28	46.6667
Patient's age	40	66.6667
Medical cost	16	26.6667
Recovery of consciousness	42	70
Patient survival rate	30	50
Amount of patient care performed by family members	19	31.6667
Nothing	4	6.66667
*Other: the condition of a patient not suffering	3	5

## Sheet: Table5
Table 5 What support did you hope to receive from healthcare professionals when making a surrogate decision?
Variables			n	%
I had enough support from healthcare professionals.			19	31.7
I have the support I hoped to receive from healthcare professionals.			41	68.3
	Healthcare proffesional	Prognostic prediction	22	53.7
		Explanation of the current situation/possible treatment	20	48.8
		Provision of appropriate information	20	48.8
		Prognosis and recovery prospects by treatment	18	43.9
		Multiple options of treatment	11	26.8
		Proposal for palliative care	9	22
		Second opinion	5	12.2
		Decisions made by healthcare proffesionals	4	9.8
		I need time to think.	3	7.3
		Presentation of similar cases and their results	3	7.3
		I need you to be close to me.	3	7.3
		I want you to consult with me.	2	4.9
		The possibility of sudden change for the worse and the reason	2	4.9
	Family	Mental support	10	24.1
		How to meke decisions	8	19.5
		The unification of family member's wishes	6	14.6
		Medical costs	3	7.3
	Patient	Probability and degree of recovery	15	36.6
		Will patients recover until they can return to their daily activities?	12	29.3
		The condition of a patient not feeling pain	11	26.8
		Being able to receive appropriate treatment	7	17.1
N=60
*Free opinions about the support they wanted from healthcare professionals and the rate of its term's occurrence.
