# Supplementary material for: Families’ Experiences of Surrogate Decision-Making and Challenges of Shared Decision- Making: A Cross-Sectional Study
Source: Research Square preprint supplement (doi:10.21203/rs.3.rs-4205018/v1), 2024-04-10
Supplement: Supplementary file 1 [file b90e43b260524f48394aea82.docx]

**Additional file 1**

**Questionnaire for participants**

1.　What was the surrogate decision-making that you made?

2.　Please tell me the name of the patient’s disease.

3.　Please tell me the details of the surrogate decision you made.

4. What did you refer to when making surrogate decisions? Please tell me everything that applies. If you have any other references, please write them in “Others.”

| 1. Discuss with family members |
| --- |
| 2. Consult a friend or someone you trust |
| 3. Refer to information such as books and press |
| 4. Refer to information on the Internet |
| 5. Refer to information from television |
| 6. Refer information from a newspaper |
| 7. Refer to previous discussions with the patient |
| 8. Nothing |
| 9. Others |

5. Did you consult with a healthcare professional when you made surrogate decisions? Select all that apply.

| 1. Primary physician |
| --- |
| 1. Physician other than the primary physician |
| 1. Nurses (nurses in hospitals) |
| 1. Nurse (home care nurse) |
| 1. Social worker |
| 1. Pharmacists |
| 1. Physical therapist |
| 1. Occupational therapist |
| 1. Speech-language pathologist |
| 1. No one |
| 1. Others |

6. How did you end up making surrogate decisions?

7. Concerning the surrogate decision you made at this time, how satisfied are you with your decision?


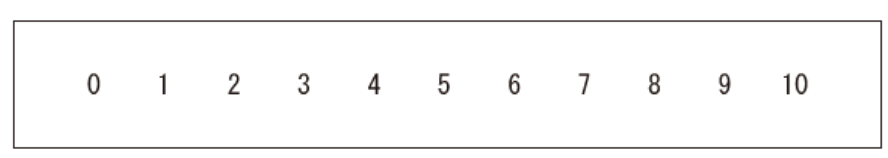


8. Considering the surrogate decision you made at this time, do you think you were able to make a surrogate decision in line with the patient's wishes?


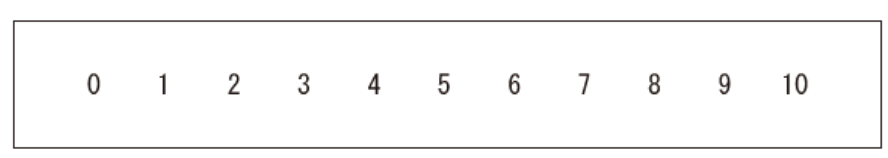


9. Please let me know if there is any support you would have wanted or needed from healthcare professionals when making this surrogate decision.

10. Have you ever heard or discussed your family's wishes for life-sustaining treatment?

| 1. I have heard about my family's wishes for life-sustaining treatment, but I have not communicated or discussed my ideas. |
| --- |
| 2. I have shared my thoughts and discussed my family's wishes for life-sustaining treatment. |
| 3. No. |

11. Have you ever been confirmed by a physician or other healthcare professional in a hospital about the treatment (resuscitation) you would like to receive during a family life crisis? Please answer one that applies.

| 1. Yes |
| --- |
| 2. No |
| 3. I do not know |

12. Please select all of the following treatments that you do not think you understand.

(any number of)

| 1. Arrival resuscitation |
| --- |
| 1. Mechanical ventilation |
| 1. Assisted circulation device |
| 1. Dialysis |
| 1. Drug to maintain blood pressure |
| 1. Nutrition (Tubal feeding etc) |
| 1. Blood transfusion and Infusions |
| 1. Infusions |
| 1. Nothing |

13. Select all that you recognize to be part of the content of CPR.

In addition, if there are actions that you are aware of that are not optional, please write them in “Other.” (any number of): CPR = [**cardiopulmonary resuscitation**](javascript:void(0);)

| 1. Artificial breath |
| --- |
| 1. Intubate trachea |
| 1. Mechanical ventilation |
| 1. Chest compression |
| 1. Automated external defibrillator |
| 1. Drug to maintain blood pressure |
| 1. Nutrition (Tubal feeding etc) |
| 1. Blood transfusion |
| 1. Infusions |
| 1. Nothing |

14. Please select “Yes” for what you think you understand, and “No” for what you think you don't understand about the following treatments.

| 1. Intubate trachea |
| --- |
| 1. Have a tracheotomy |
| 1. Non-invasive positive airway pressure ventilation |

15. Would you like to have the opportunity to discuss together how your family thinks about the medical care they want to receive during a life crisis?


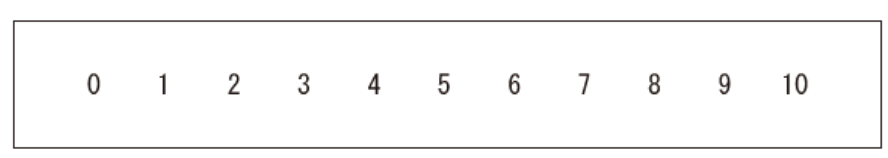


16. Why did you answer the above question as you did?

17. How difficult is it for you to ask patients directly about the medical care the patient wants to receive during a life crisis?


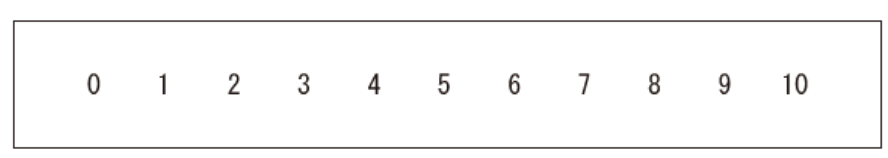


18. Do you have essential information or values to consider when making surrogate decisions in the event of a life crisis for a patient? Please tell me everything that applies. If there are other options, please write something else.

| 1. My age |
| --- |
| 1. Patient's age |
| 1. Medical cost |
| 1. Recovery of consciousness |
| 1. Patient survival rate |
| 1. Amount of patient care performed by family members |
| 1. Nothing |
| 1. *Other: the condition of a patient not suffering |
